# Supplementary material for: New Insight into Assembled Fe3O4@PEI@Ag Structure as Acceptable Agent with Enzymatic and Photothermal Properties
Source: MDPI journal article supplement (doi:10.3390/ijms231810743), 2022-09-15
Supplement: s1 [file s1]

# **New Insight into Assembled Fe<sub>3</sub>O<sub>4</sub>@PEI@Ag Structure as Acceptable Agent with Enzymatic and Photothermal Properties**

Teng Wang<sup>1,2#</sup>, Xi Hu<sup>1,2#</sup>, Yujun Yang<sup>3</sup>, Qing Wu<sup>1,2</sup>, Chengdian He<sup>1,2</sup>, Xiong He<sup>1,2</sup>,  
Zhenyu Wang<sup>1,2\*</sup>, Xiang Mao<sup>1,2\*</sup>

1. State Key Laboratory of Ultrasound in Medicine and Engineering, College of Biomedical Engineering, Chongqing Medical University, Chongqing, 400016, P. R. China.

2.Chongqing Key Laboratory of Biomedical Engineering, Chongqing Medical University, Chongqing, 400016, P. R. China.

3.Key Laboratory of Laboratory Medical Diagnostics, Ministry of Education, Department of Laboratory Medicine, Chongqing Medical Laboratory Microfluidics and SPRi Engineering Research Center, Chongqing Medical University, Chongqing 400016, P. R. China

Teng Wang and Xi Hu contributed equally in this work.

## ***Supporting Information***

---

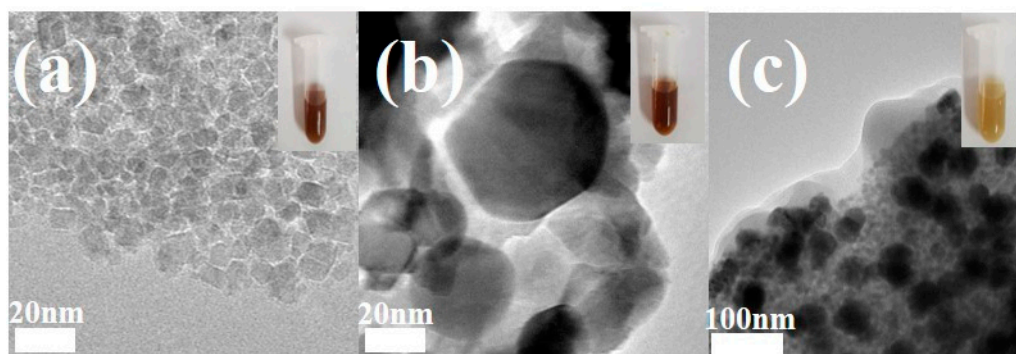

**Figure S1** TEM images of (a) Fe<sub>3</sub>O<sub>4</sub> NPs, (b) Ag NPs, (c) Fe<sub>3</sub>O<sub>4</sub>@PEI@Ag structure.

## *Supporting Information*

---

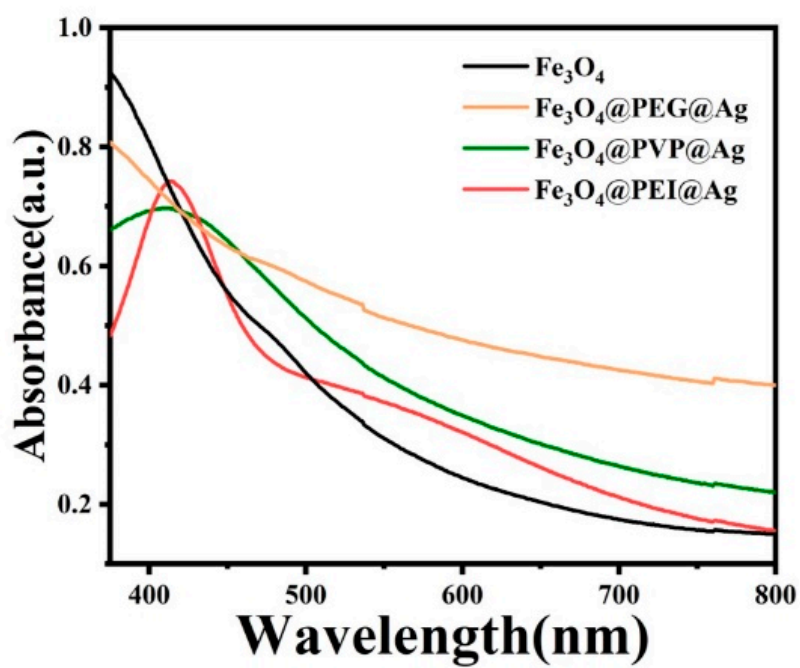

**Figure S2** UV-vis absorbance spectra of  $\text{Fe}_3\text{O}_4$  NPs,  $\text{Fe}_3\text{O}_4@\text{PEG}@\text{Ag}$  structure,  $\text{Fe}_3\text{O}_4@\text{PVP}@\text{Ag}$  structure and  $\text{Fe}_3\text{O}_4@\text{PEI}@\text{Ag}$  structure.

## *Supporting Information*

---

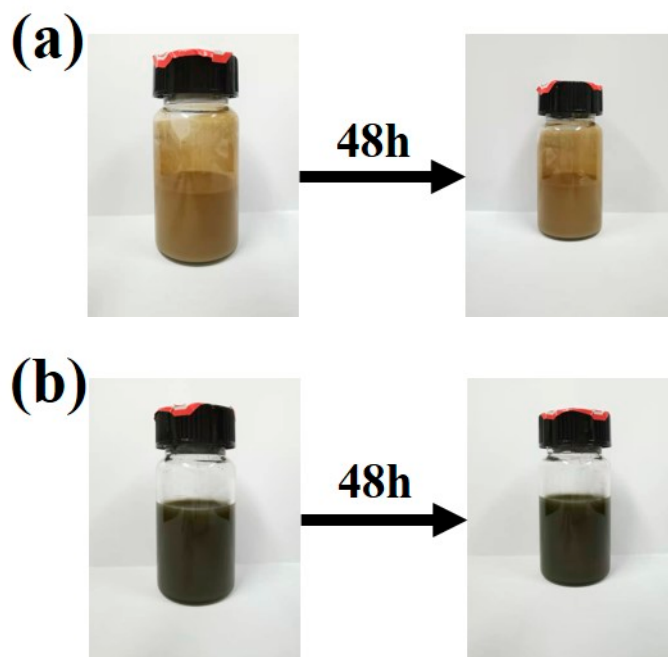

**Figure S3** (a) The stability of  $\text{Fe}_3\text{O}_4@\text{PEI}@\text{Ag}$  structure after standing 48h; (b) The stability of  $\text{Fe}_3\text{O}_4@\text{PEI}@\text{Ag}@\text{ICG}$  structure after standing 48h

## Supporting Information

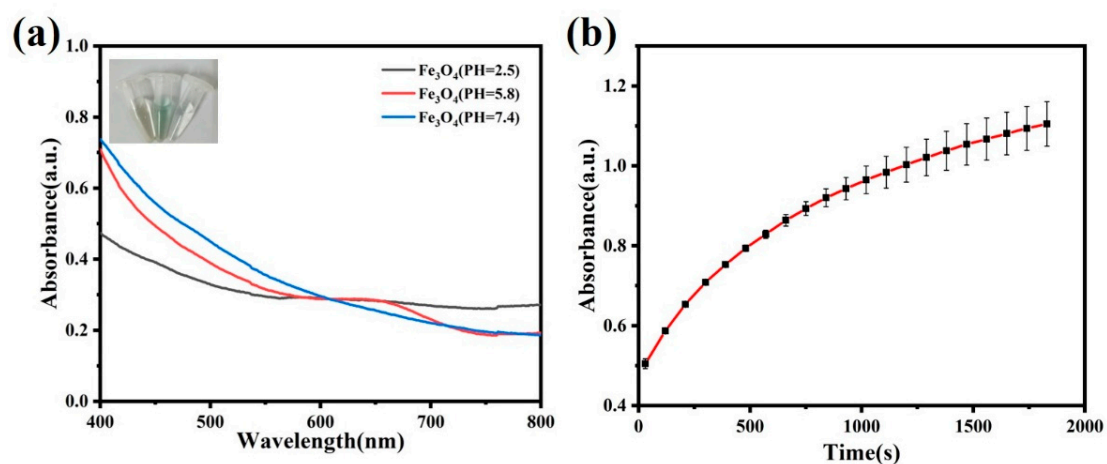

**Figure S4** (a) Effect of pH on the peroxidase-like activity of Fe<sub>3</sub>O<sub>4</sub> NPs; (b) Peroxidase-like activity of Fe<sub>3</sub>O<sub>4</sub>@PEI@Ag structure during 30 min.

## Supporting Information

**Table S1** Comparison of the kinetic data of Fe<sub>3</sub>O<sub>4</sub>@PEI@Ag structure with that of HRP in the previous literature

| Nanozymes                                        | K <sub>m</sub> (mM)           |       | V <sub>max</sub> (×10 <sup>-7</sup> M s <sup>-1</sup> ) |       |
|--------------------------------------------------|-------------------------------|-------|---------------------------------------------------------|-------|
|                                                  | H <sub>2</sub> O <sub>2</sub> | TMB   | H <sub>2</sub> O <sub>2</sub>                           | TMB   |
| Fe <sub>3</sub> O <sub>4</sub> @PEI@Ag structure | 1.192                         | 0.302 | 1.299                                                   | 1.163 |
| HRP[1]                                           | 3.7                           | 0.434 | 0.87                                                    | 1     |
| CiCo <sub>2</sub> O <sub>4</sub> MS[2]           | 9.41                          | 0.14  | 2.58                                                    | 0.223 |
| Ni-MOF nanosheet[3]                              | 6.53                          | 0.36  | 13                                                      | 0.249 |
| ZnFe <sub>2</sub> O <sub>4</sub> MNPs[4]         | 1.66                          | 0.85  | 0.774                                                   | 1.331 |
| Fe-Mil-88NH <sub>2</sub> [5]                     | 2.06                          | 0.028 | 1.047                                                   | 0.704 |
| Pd/Fe <sub>3</sub> O <sub>4</sub> -PEI-RGO[6]    | 3.66                          |       | 0.4                                                     |       |
| PdNPs[7]                                         | 0.21                          |       | 0.021                                                   |       |

## *Supporting Information*

---

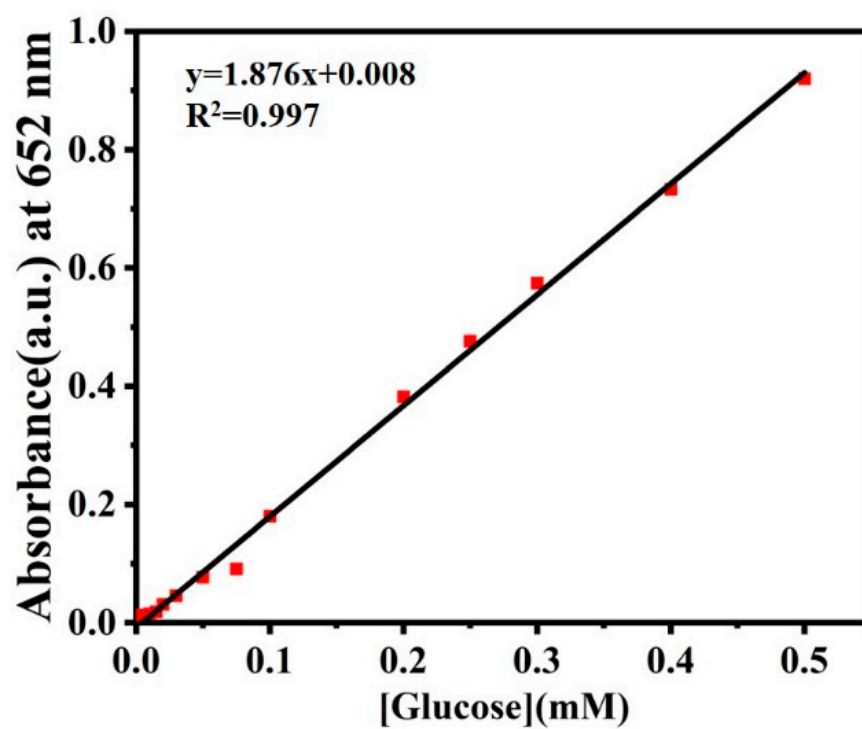

**Figure S5** The linear relationship between the absorbance intensity and the concentration of glucose.

## Supporting Information

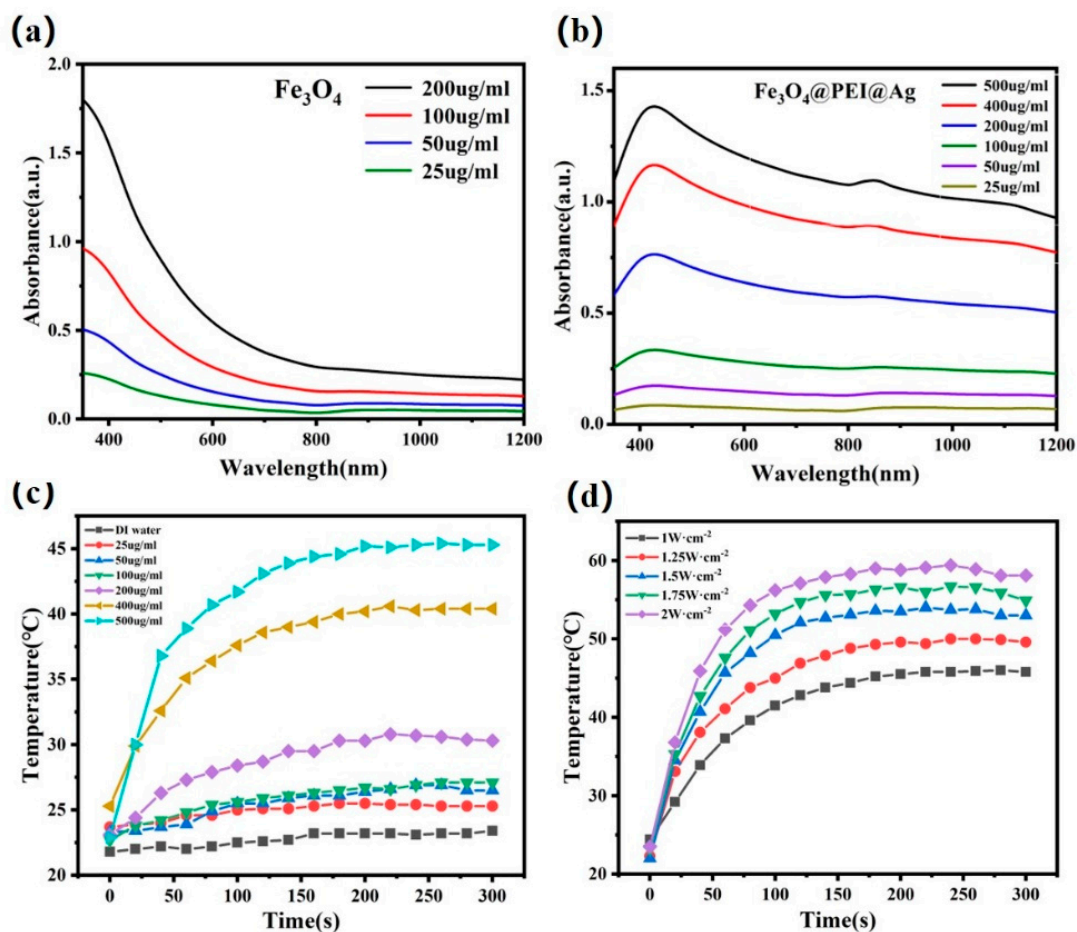

**Figure S6** (a) Vis-NIR absorbance spectral of Fe<sub>3</sub>O<sub>4</sub> NPs dispersions with different concentrations; (b) Vis-NIR absorbance spectral of Fe<sub>3</sub>O<sub>4</sub>@PEI@Ag structure dispersions with different concentrations; (c) Temperature increase of Fe<sub>3</sub>O<sub>4</sub>@PEI@Ag structure dispersion with gradient concentrations under 808 nm NIR laser irradiation; (d) Temperature increase of Fe<sub>3</sub>O<sub>4</sub>@PEI@Ag@ICG structure dispersion exhibited laser power density-dependent profiles.



# Supporting Information

---

## References

1. Gao, L.; Zhuang, J.; Nie, L.; Zhang, J.; Zhang, Y.; Gu, N.; Wang, T.; Feng, J.; Yang, D.; Perrett, S.; Yan, X., Intrinsic peroxidase-like activity of ferromagnetic nanoparticles. *Nat Nanotechnol* **2007**, 2, (9), 577-83.
2. Huang, W.; Lin, T. Y.; Cao, Y.; Lai, X. Y.; Peng, J.; Tu, J. C., Hierarchical NiCo<sub>2</sub>O<sub>4</sub> Hollow Sphere as a Peroxidase Mimetic for Colorimetric Detection of H<sub>2</sub>O<sub>2</sub> and Glucose. *Sensors-Basel* **2017**, 17, (1).
3. Chen, J.; Shu, Y.; Li, H.; Xu, Q.; Hu, X., Nickel metal-organic framework 2D nanosheets with enhanced peroxidase nanozyme activity for colorimetric detection of H<sub>2</sub>O<sub>2</sub>. *Talanta* **2018**, 189, 254-261.
4. Su, L.; Feng, J.; Zhou, X.; Ren, C.; Li, H.; Chen, X., Colorimetric detection of urine glucose based ZnFe<sub>2</sub>O<sub>4</sub> magnetic nanoparticles. *Anal Chem* **2012**, 84, (13), 5753-8.
5. Tan, H.; Li, Q.; Zhou, Z.; Ma, C.; Song, Y.; Xu, F.; Wang, L., A sensitive fluorescent assay for thiamine based on metal-organic frameworks with intrinsic peroxidase-like activity. *Anal Chim Acta* **2015**, 856, 90-5.
6. Li, S. L.; Li, H.; Chen, F. J.; Liu, J.; Zhang, H. L.; Yang, Z. Y.; Wang, B. D., Strong coupled palladium nanoparticles decorated on magnetic graphene nanosheets as enhanced peroxidase mimetics for colorimetric detection of H<sub>2</sub>O<sub>2</sub>. *Dyes Pigments* **2016**, 125, 64-71.
7. Kuo, C. H.; Lamontagne, L. K.; Brodsky, C. N.; Chou, L. Y.; Zhuang, J.; Sneed, B. T.; Sheehan, M. K.; Tsung, C. K., The effect of lattice strain on the catalytic properties of Pd nanocrystals. *ChemSusChem* **2013**, 6, (10), 1993-2000.
